# Supplementary material for: Acute ethanol stress induces sumoylation of conserved chromatin structural proteins in Saccharomyces cerevisiae
Source: PubMed Central journal article supplement — Mol Biol Cell. 2021 May 15;32(11):1121–33. doi: 10.1091/mbc.E20-11-0715 (PMC8351541; doi:10.1091/mbc.e20-11-0715), 2021-05-15
Supplement: mbc-32-1121-s001.pdf [file mbc-32-1121-s001.pdf]

# Supplemental Materials

*Molecular Biology of the Cell*

Bradley *et al.*

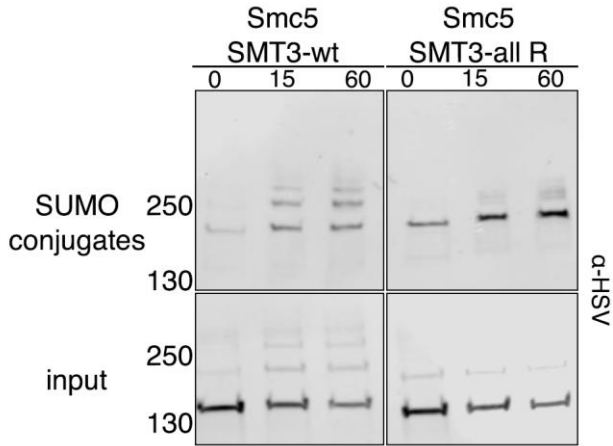

**Supplemental Figure 1. *Ethanol-induced Smc5 appears to be primarily a poly-sumoylation chain***

(A-B) Cells with 3xHSV-Smc5 expressed from its endogenous promoter and expressing either His<sub>6</sub>-SMT3 that contains all lysine residues (SMT3-wt) or all lysine residues converted to arginine residues (SMT3-all R) were exposed to 10% ethanol over a 60-minute time course. Cell lysates (bottom panels) and metal affinity purified sumoylated proteins (top panels) were examined by Western analysis using an anti-HSV antibody.

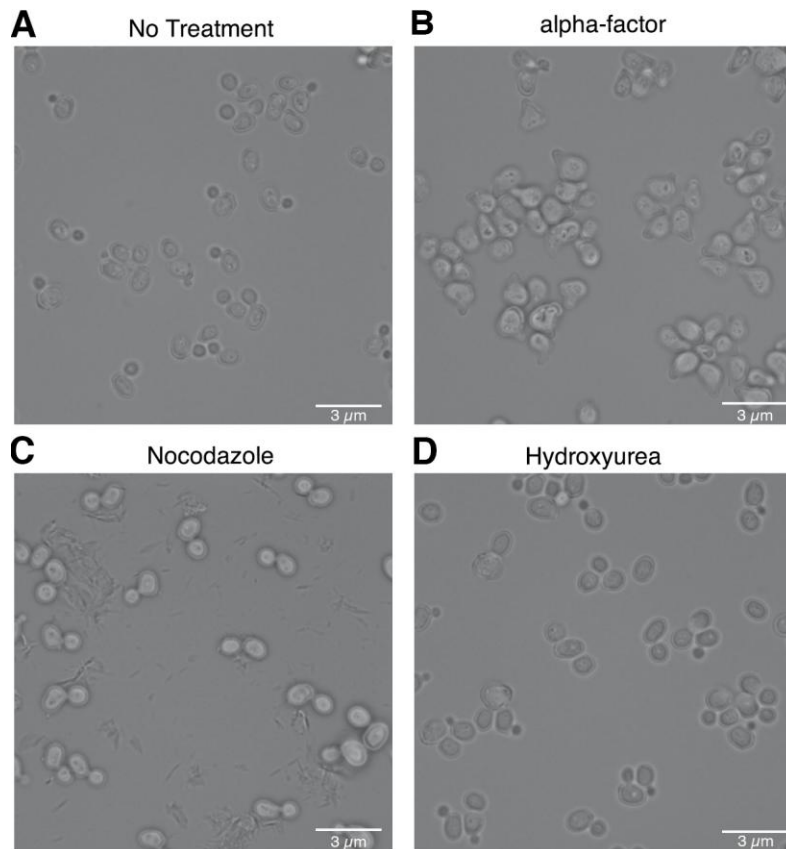

**Supplemental Figure 2. Images of yeast cells during cell-cycle arrest.**

(A) Cells in asynchronous growth. (B) Cells arrested with in G1 with alpha factor. (C) Cells arrested in G2/M with nocodazole. (D) Cells arrested in early S-phase with hydroxyurea.
